# Supplementary material for: Modulated Electro-Hyperthermic (mEHT) Treatment in the Therapy of Inoperable Pancreatic Cancer Patients—A Single-Center Case-Control Study
Source: MDPI journal article supplement (doi:10.3390/diseases9040081), 2021-11-03
Supplement: s1 [file s1]

**Table S1.** Basic demographic and clinical characteristics are summarized of the case and control groups (mean  $\pm$  SD (median and (range))), which were further subdivided by the presence of metastasis. Unit of frequency data is the number of observations (percentage).

| Parameter                                  | mEHT treated,<br>without metastasis<br>(n = 19) | mEHT treated,<br>with metastasis<br>(n = 20) | Control,<br>without metastasis<br>(n = 15) | Control,<br>with metastasis<br>(n = 24) | p-Value                                                              |
|--------------------------------------------|-------------------------------------------------|----------------------------------------------|--------------------------------------------|-----------------------------------------|----------------------------------------------------------------------|
| Age (years)                                | 66.75 $\pm$ 11.96<br>(69 (45 – 82))             | 65.09 $\pm$ 7.69<br>(65 (48 – 85))           | 67.06 $\pm$ 9.42<br>(67 (47 – 78))         | 65.37 $\pm$ 8.42<br>(66 (46 – 76))      | Case-Control: 0.9526 <sup>1</sup><br>Metastasis: 0.4381 <sup>1</sup> |
| Male gender                                | 10 (52.6)                                       | 8 (44.0)                                     | 5 (33.3)                                   | 13 (54.2)                               | 0.9740 <sup>2</sup>                                                  |
| Location of the tumor                      |                                                 |                                              |                                            |                                         |                                                                      |
| - Head of the pancreas                     | 11 (57.9)                                       | 9 (45)                                       | 10 (66.7)                                  | 16 (66.6)                               | 0.3159 <sup>2</sup>                                                  |
| - Body of the pancreas                     | 7(36.8)                                         | 7 (35)                                       | 4 (26.6)                                   | 4 (16.7)                                |                                                                      |
| - Tail of the pancreas                     | 1 (5.3)                                         | 4 (20)                                       | 1 (6.7)                                    | 4 (16.7)                                |                                                                      |
| Without radiologically detected ascites    | 13 (61.9)                                       | 8 (38.1)                                     | 10 (38.5)                                  | 16 (61.5)                               | 0.2006 <sup>2</sup>                                                  |
| Overall survival (month)                   | 19.83 $\pm$ 10.26<br>(19.78 (6.5 – 47.1))       | 14.23 $\pm$ 6.02<br>(14.82 (4.4 – 23.0))     | 18.54 $\pm$ 14.44<br>(11.6 (7.0 – 48.8))   | 11.48 $\pm$ 6.93<br>(10.5 (2.4 – 31.8)) | Case-Control: 0.1979 <sup>1</sup><br>Metastasis: 0.0045 <sup>1</sup> |
| Progression-free survival (month)          | 14.20 $\pm$ 8.72<br>(12.91 (4.5 – 34.8))        | 9.65 $\pm$ 4.09<br>(9.38 (4.2 – 18.2))       | 10.44 $\pm$ 5.06<br>(8.87 (3.4 – 26.0))    | 7.33 $\pm$ 5.31<br>(5.36 (1.6 – 18.4))  | Case-Control: 0.0164 <sup>1</sup><br>Metastasis: 0.0067 <sup>1</sup> |
| 1-year survival                            | 14 (73.7)                                       | 12 (60.0)                                    | 6 (40.0)                                   | 10 (41.6)                               | 0.0290 <sup>2</sup>                                                  |
| 2-year survival #                          | 6 (31.6)                                        | 0 (0.0)                                      | 4 (26.6)                                   | 1 (4.2)                                 | 0.9420 <sup>2</sup>                                                  |
| 3-year survival #                          | 1 (5.3)                                         | 0 (0.0)                                      | 3 (20.0)                                   | 0 (0.0)                                 | 0.2303 <sup>2</sup>                                                  |
| 1-year PFS                                 | 10 (52.6)                                       | 5 (25.0)                                     | 2 (13.3)                                   | 5 (20.8)                                | 0.0587 <sup>2</sup>                                                  |
| 2-year PFS                                 | 2 (10.5)                                        | 0 (0.0)                                      | 1 (6.7)                                    | 0 (0.0)                                 | 0.6979 <sup>2</sup>                                                  |
| Number of mEHT treatments                  | 62.53 $\pm$ 17.54<br>(65 (32-102))              | 56.00 $\pm$ 32.80<br>(52 (21 – 154))         | –                                          | –                                       | 0.3321 <sup>3</sup>                                                  |
| Time to first mEHT treatment (days)        | 105.74 $\pm$ 171.30<br>(46 (73 – 718))          | 93.70 $\pm$ 125.94<br>(44 (6 – 445))         | –                                          | –                                       | 0.8993 <sup>3</sup>                                                  |
| OS after the first mEHT treatment (month)  | 16.35 $\pm$ 7.06<br>(17.6 (5.0 – 22.7))         | 11.15 $\pm$ 6.33<br>(9.3 (2.3 – 21.4))       | –                                          | –                                       | 0.0192 <sup>3</sup>                                                  |
| OS after the last mEHT treatment (month)   | 8.22 $\pm$ 6.37<br>(8.2 (0.3 – 20.6))           | 5.01 $\pm$ 4.93<br>(8.2 (0.3 – 16.7))        | –                                          | –                                       | 0.2110 <sup>3</sup>                                                  |
| PFS after the first mEHT treatment (month) | 10.72 $\pm$ 6.28<br>(10.7 (3.0 – 23.0))         | 6.57 $\pm$ 3.63<br>(6.2 (1.8 – 16.6))        | –                                          | –                                       | 0.0305 <sup>3</sup>                                                  |
| PFS after the last mEHT treatment (month)  | 2.59 $\pm$ 6.24<br>(1.8 (-9.0 – 15.8))          | 0.43 $\pm$ 2.67<br>(0.61 (-7.2 – 6.1))       | –                                          | –                                       | 0.3761 <sup>3</sup>                                                  |

<sup>1</sup> Two-way ANOVA, <sup>2</sup> Cochran-Mantel-Haenszel test, <sup>3</sup> Wilcoxon-Mann-Whitney rank sum test. mEHT: modulated electro-hyperthermia, OS: overall survival, PFS: progression-free survival. # 2 and 4 right-censored case patients had lower observation time than 24 and 36 months, respectively, and 1 censored control patient had a censor time between 24 – 36 months.

**Table S2.** Basic demographic and clinical characteristics are summarized of the case and control groups (mean  $\pm$  SD (median and (range))), which were further subdivided by the presence of ascites. Unit of frequency data is the number of observations (percentage).

| Parameter                                  | mEHT treated,<br>without ascites<br>(n = 21) | mEHT treated,<br>with ascites<br>(n = 18) | Control,<br>without ascites<br>(n = 26)   | Control,<br>with ascites<br>(n = 13)      | p-Value                                                              |
|--------------------------------------------|----------------------------------------------|-------------------------------------------|-------------------------------------------|-------------------------------------------|----------------------------------------------------------------------|
| Age (years)                                | 67.08 $\pm$ 10.69<br>(69 (45 – 84))          | 64.51 $\pm$ 8.99<br>(65 (46 – 81))        | 66.63 $\pm$ 9.83<br>(69 (45 – 78))        | 64.81 $\pm$ 6.15<br>(64 (51 – 76))        | Case-Control: 0.9525 <sup>1</sup><br>Metastasis: 0.3135 <sup>1</sup> |
| Male gender                                | 11 (52.4)                                    | 7 (38.9)                                  | 11 (42.3)                                 | 7 (53.8)                                  | 0.9851 <sup>2</sup>                                                  |
| Location of the tumor                      |                                              |                                           |                                           |                                           |                                                                      |
| - Head of the pancreas                     | 13 (61.9)                                    | 7 (38.9)                                  | 17 (65.4)                                 | 9 (69.2)                                  | 0.3506 <sup>2</sup>                                                  |
| - Body of the pancreas                     | 1 (4.8)                                      | 4 (22.2)                                  | 4 (15.4)                                  | 1 (7.7)                                   |                                                                      |
| - Tail of the pancreas                     | 7 (33.3)                                     | 7 (38.9)                                  | 52 (19.2)                                 | 3 (23.1)                                  |                                                                      |
| Without distant metastasis                 | 13 (61.9)                                    | 6 (33.3)                                  | 10 (38.5)                                 | 5 (38.5)                                  | 0.2838 <sup>2</sup>                                                  |
| Overall survival (month)                   | 19.35 $\pm$ 8.94<br>(21.26 (6.5 – 47.1))     | 11.16 $\pm$ 7.78<br>(12.76 (4.4 – 34.8))  | 14.79 $\pm$ 10.53<br>(10.30 (4.1 – 45.4)) | 13.01 $\pm$ 11.85<br>(11.04 (2.4 – 48.8)) | Case-Control: 0.2149 <sup>1</sup><br>Metastasis: 0.1202 <sup>1</sup> |
| Progression-free survival (month)          | 12.46 $\pm$ 6.96<br>(10.74 (4.5 – 32.4))     | 11.17 $\pm$ 7.29<br>(10.02 (4.2 – 34.8))  | 9.35 $\pm$ 5.77<br>(8.84 (1.6 – 26.0))    | 6.88 $\pm$ 4.19<br>(6.93 (2.1 – 16.4))    | Case-Control: 0.0208 <sup>1</sup><br>Metastasis: 0.2090 <sup>1</sup> |
| 1-year OS                                  | 16 (76.2)                                    | 10 (55.6)                                 | 11 (42.3)                                 | 5 (38.5)                                  | 0.0176 <sup>2</sup>                                                  |
| 2-year OS #                                | 4 (19.0)                                     | 2 (11.1)                                  | 4 (15.4)                                  | 1 (7.7)                                   | 0.5636 <sup>2</sup>                                                  |
| 3-year OS #                                | 1 (4.7)                                      | 0 (0.0)                                   | 2 (7.7)                                   | 1 (7.7)                                   | 0.4100 <sup>2</sup>                                                  |
| 1-year PFS                                 | 9 (42.9)                                     | 6 (33.3)                                  | 5 (19.2)                                  | 2 (15.4)                                  | 0.0398 <sup>2</sup>                                                  |
| 2-year PFS                                 | 1 (4.7)                                      | 1 (5.6)                                   | 1 (3.8)                                   | 0 (0.0)                                   | 0.5375 <sup>2</sup>                                                  |
| Number of mEHT treatments                  | 66.86 $\pm$ 28.16<br>(67 (22 – 154))         | 50.22 $\pm$ 21.12<br>(68 (37 – 85))       | –                                         | –                                         | 0.0648 <sup>3</sup>                                                  |
| Time to first mEHT treatment (days)        | 82.90 $\pm$ 151.88<br>(37 (2 – 718))         | 119.00 $\pm$ 144.91<br>(133 (6 – 445))    | –                                         | –                                         | 0.4301 <sup>3</sup>                                                  |
| OS after the first mEHT treatment (month)  | 16.63 $\pm$ 6.22<br>(17.94 (5.0 – 26.7))     | 10.25 $\pm$ 6.67<br>(8.43 (2.3 – 26.6))   | –                                         | –                                         | 0.0028 <sup>3</sup>                                                  |
| OS after the last mEHT treatment (month)   | 8.64 $\pm$ 6.18<br>(9.50 (0.3 – 20.6))       | 4.16 $\pm$ 4.44<br>(2.38 (0.3 – 15.8))    | –                                         | –                                         | 0.0322 <sup>3</sup>                                                  |
| PFS after the first mEHT treatment (month) | 9.74 $\pm$ 5.40<br>(8.80 (2.4 – 23.0))       | 7.26 $\pm$ 5.35<br>(5.80 (1.8 – 22.7))    | –                                         | –                                         | 0.0883 <sup>3</sup>                                                  |
| PFS after the last mEHT treatment (month)  | 1.75 $\pm$ 5.03<br>(0.95 (-7.2 – 12.4))      | 1.17 $\pm$ 4.82<br>(0.49 (-9.0 – 15.8))   | –                                         | –                                         | 0.7142 <sup>3</sup>                                                  |

<sup>1</sup> Two-way ANOVA, <sup>2</sup> Cochran-Mantel-Haenszel test, <sup>3</sup> Wilcoxon-Mann-Whitney rank sum test. mEHT: modulated electro-hyperthermia, OS: overall survival, PFS: progression-free survival. # 2 and 4 right-censored case patients had lower observation time than 24 and 36 months, respectively, and 1 censored control patient had a censor time between 24 – 36 months.

**Table S3a.** Basic demographic and clinical characteristics are summarized of the case and control groups (mean  $\pm$  SD (median and (range))), which were further subdivided by the presence of ascites and/or metastasis. Unit of frequency data is the number of observations (percentage).

| Parameter                                   | mEHT treated,<br>without ascites<br>without metastasis<br>(n = 13) | mEHT treated,<br>with ascites<br>without metastasis<br>(n = 6) | mEHT treated,<br>without ascites<br>with metastasis<br>(n = 8) | mEHT treated,<br>with ascites<br>with metastasis<br>(n = 12) | p-Value                                                              |
|---------------------------------------------|--------------------------------------------------------------------|----------------------------------------------------------------|----------------------------------------------------------------|--------------------------------------------------------------|----------------------------------------------------------------------|
| Age (years)                                 | 67.79 $\pm$ 11.88<br>(70 (45 – 82))                                | 64.50 $\pm$ 12.93<br>(68 (46 – 81))                            | 65.93 $\pm$ 9.07<br>(65 (56 – 85))                             | 64.52 $\pm$ 6.70<br>(65 (48 – 76))                           | Case-Control: 0.9530 <sup>1</sup><br>Metastasis: 0.6882 <sup>1</sup> |
| Male gender                                 | 7 (53.8)                                                           | 3 (50.0)                                                       | 4 (50.0)                                                       | 4 (33.3)                                                     | 0.8160 <sup>2</sup>                                                  |
| Location of the tumor                       |                                                                    |                                                                |                                                                |                                                              |                                                                      |
| - Head of the pancreas                      | 7 (53.8)                                                           | 4 (66.7)                                                       | 6 (75.0)                                                       | 3 (25.0)                                                     | 0.4629 <sup>2</sup>                                                  |
| - Body of the pancreas                      | 1 (7.7)                                                            | 0 (0.0)                                                        | 0 (0.0)                                                        | 4 (33.3)                                                     |                                                                      |
| - Tail of the pancreas                      | 5 (38.5)                                                           | 2 (33.3)                                                       | 2 (25.0)                                                       | 5 (41.7)                                                     |                                                                      |
| Overall survival (month)                    | 20.47 $\pm$ 10.59<br>(21.32 (6.5 – 47.1))                          | 18.43 $\pm$ 10.29<br>(13.55 (10.2 – 34.8))                     | 17.53 $\pm$ 5.44<br>(10.28 (10.1 – 23.0))                      | 12.03 $\pm$ 5.52<br>(11.37 (4.4-18.3))                       | Case-Control: 0.1985 <sup>1</sup><br>Metastasis: 0.0206 <sup>1</sup> |
| Progression-free survival (month)           | 14.75 $\pm$ 7.87<br>(14.85 (4.5 – 32.4))                           | 13.00 $\pm$ 11.08<br>(9.05 (5.0 – 34.8))                       | 8.74 $\pm$ 2.61<br>(8.23 (6.0 – 13.7))                         | 10.26 $\pm$ 4.86<br>(10.02 (4.2 – 18.2))                     | Case-Control: 0.0172 <sup>1</sup><br>Metastasis: 0.0410 <sup>1</sup> |
| 1-year OS                                   | 10 (76.9)                                                          | 4 (66.7)                                                       | 6 (75.0)                                                       | 6 (50.0)                                                     | 0.0202 <sup>2</sup>                                                  |
| 2-year OS #                                 | 4 (30.8)                                                           | 2 (33.3)                                                       | 0 (0.0)                                                        | 0 (0.0)                                                      | 0.8662 <sup>2</sup>                                                  |
| 3-year OS #                                 | 1 (7.7)                                                            | 0 (0.0)                                                        | 0 (0.0)                                                        | 0 (0.0)                                                      | 0.2392 <sup>2</sup>                                                  |
| 1-year PFS                                  | 8 (61.5)                                                           | 2 (33.3)                                                       | 1 (12.5)                                                       | 4 (33.3)                                                     | 0.0664 <sup>2</sup>                                                  |
| 2-year PFS                                  | 1 (7.7)                                                            | 1 (16.7)                                                       | 0 (0.0)                                                        | 0 (0.0)                                                      | 0.7019 <sup>2</sup>                                                  |
| Number of mEHT treatments                   | 64.69 $\pm$ 18.3<br>(65 (32 – 102))                                | 57.83 $\pm$ 16.29<br>(59 (40 – 80))                            | 70.38 $\pm$ 40.84<br>(69 (22 – 154))                           | 46.42 $\pm$ 22.84<br>(47 (21 – 85))                          | 0.1799 <sup>3</sup>                                                  |
| Time to first mEHT treatment (days)         | 102.38 $\pm$ 190.49<br>(46 (2– 718))                               | 113.00 $\pm$ 135.88<br>(56 (15-371))                           | 51.25 $\pm$ 43.09<br>(33 (14-130))                             | 122.00 $\pm$ 155.01<br>(50 (6-445))                          | 0.3753 <sup>3</sup>                                                  |
| OS after the first mEHT treatment (month)   | 17.11 $\pm$ 6.82<br>(17.94 (5.0-26.7))                             | 14.72 $\pm$ 7.95<br>(10.99 (8.1-26.6))                         | 15.84 $\pm$ 5.44<br>(17.87 (9.1-21.4))                         | 8.02 $\pm$ 4.87<br>(6.92 (2.3-18.0))                         | 0.0052 <sup>3</sup>                                                  |
| OS after the last mEHT treatment (month)    | 8.79 $\pm$ 6.55<br>(10.87 (0.3 – 20.6))                            | 7.00 $\pm$ 6.34<br>(4.80 (1-15.8))                             | 8.40 $\pm$ 5.94<br>(6.95 (1.6-16.7))                           | 2.74 $\pm$ 2.38<br>(1.82 (0.3 – 8.4))                        | 0.0415 <sup>3</sup>                                                  |
| PFS after the first mEHT treatment (month)  | 11.39 $\pm$ 5.96<br>(12.62 (3.0 – 23.0))                           | 9.29 $\pm$ 7.29<br>(6.09 (13.9-22.6))                          | 7.05 $\pm$ 3.02<br>(6.46 (2.4-12.1))                           | 6.25 $\pm$ 4.09<br>(4.98 (1.8-16.6))                         | 0.0896 <sup>3</sup>                                                  |
| PFS after the last mEHT treatment (month) * | 3.07 $\pm$ 5.34<br>(3.0 (-5.8-12.4))                               | 1.57 $\pm$ 8.63<br>(-0.94 (-9.0 – 15.8))                       | -0.39 $\pm$ 3.88<br>(0.26 (-7.2 – 6.1))                        | 0.97 $\pm$ 1.4<br>(0.85 (-0.9 – 3.7))                        | 0.4577 <sup>3</sup>                                                  |

<sup>1</sup> Two-way ANOVA, <sup>2</sup> Cochran-Mantel-Haenszel test, <sup>3</sup> One-way ANOVA. mEHT: modulated electro-hyperthermia, OS: overall survival, PFS: progression-free survival. Note: *p*-values are the same in Table S3a and S3b as comparison was performed with all 8 subgroups in a “2x4” manner. # 2 and 4 right-censored case patients had lower observation time than 24 and 36 months, respectively, and 1 censored control patient had a censor time between 24 – 36 months. \* Negative values in ‘PFS after the last mEHT treatment’ means that progression developed during the mEHT treatments.

**Table S3b.** Basic demographic and clinical characteristics are summarized of the case and control groups (mean  $\pm$  SD (median and (range))), which were further subdivided by the presence of ascites and/or metastasis. Unit of frequency data is the number of observations (percentage).

| Parameter                         | Control,<br>without ascites<br>without metastasis<br>(n = 10) | Control,<br>with ascites<br>without metastasis<br>(n = 5) | Control,<br>without ascites<br>with metastasis<br>(n = 16) | Control,<br>with ascites<br>with metastasis<br>(n = 8) | p-Value                                                              |
|-----------------------------------|---------------------------------------------------------------|-----------------------------------------------------------|------------------------------------------------------------|--------------------------------------------------------|----------------------------------------------------------------------|
| Age (years)                       | 67.73 $\pm$ 9.90<br>(68 (47 – 78))                            | 65.72 $\pm$ 9.31<br>(67 (51 – 76))                        | 65.94 $\pm$ 10.04<br>(70 (46 – 76))                        | 64.25 $\pm$ 3.80<br>(64 (59 – 780))                    | Case-Control: 0.9530 <sup>1</sup><br>Metastasis: 0.6882 <sup>1</sup> |
| Male gender                       | 2 (20.0)                                                      | 3 (60.0)                                                  | 98 (56.3)                                                  | 4 (50.0)                                               | 0.8160 <sup>2</sup>                                                  |
| Location of the tumor             |                                                               |                                                           |                                                            |                                                        |                                                                      |
| - Head of the pancreas            | 7 (70.0)                                                      | 3 (60.0)                                                  | 10 (62.5)                                                  | 6 (75.0)                                               | 0.4629 <sup>2</sup>                                                  |
| - Body of the pancreas            | 0 (0.0)                                                       | 1 (20.0)                                                  | 4 (25.0)                                                   | 0 (0.0)                                                |                                                                      |
| - Tail of the pancreas            | 3 (30.0)                                                      | 1 (20.0)                                                  | 2 (12.5)                                                   | 2 (25.0)                                               |                                                                      |
| Overall survival (month)          | 18.54 $\pm$ 13.86<br>(10.92 (8.4 – 45.4))                     | 18.56 $\pm$ 17.25<br>(11.76 (7.0 – 48.8))                 | 12.44 $\pm$ 7.37<br>(10.28 (4.1-31.8))                     | 9.54 $\pm$ 5.92<br>(10.81 (2.4 – 19.0))                | Case-Control: 0.1985 <sup>1</sup><br>Metastasis: 0.0206 <sup>1</sup> |
| Progression-free survival (month) | 11.20 $\pm$ 5.32<br>(10.05 (8.3-26.0))                        | 8.94 $\pm$ 4.67<br>(8.25 (3.4-16.4))                      | 8.20 $\pm$ 5.91<br>(6.60 (1.6 – 18.4))                     | 5.60 $\pm$ 3.57<br>(4.43 (2.1 – 12.8))                 | Case-Control: 0.0172 <sup>1</sup><br>Metastasis: 0.0410 <sup>1</sup> |
| 1-year OS                         | 4 (40.0)                                                      | 2 (40.0)                                                  | 7 (43.8)                                                   | 3 (37.5)                                               | 0.0202 <sup>2</sup>                                                  |
| 2-year OS <sup>#</sup>            | 3 (30.0)                                                      | 1 (20.0)                                                  | 1 (6.3)                                                    | 0 (0.0)                                                | 0.9591 <sup>2</sup>                                                  |
| 3-year OS <sup>#</sup>            | 2 (20.0)                                                      | 1 (20.0)                                                  | 0 (0.0)                                                    | 0 (0.0)                                                | 0.1952 <sup>2</sup>                                                  |
| 1-year PFS                        | 1 (10.0)                                                      | 1 (20.0)                                                  | 4 (25.0)                                                   | 1 (12.5)                                               | 0.0664 <sup>2</sup>                                                  |
| 2-year PFS                        | 1 (10.0)                                                      | 0 (0.0)                                                   | 0 (0.0)                                                    | 0 (0.0)                                                | 0.7019 <sup>2</sup>                                                  |

<sup>1</sup> Two-way ANOVA, <sup>2</sup> Cochran-Mantel-Haenszel test. Note: p-values are the same in Table S3a and S3b as comparison was performed with all 8 subgroups in a “2x4” manner. <sup>#</sup> 2 and 4 right-censored case patients had lower observation time than 24 and 36 months, respectively, and 1 censored control patient had a censor time between 24 – 36 months.

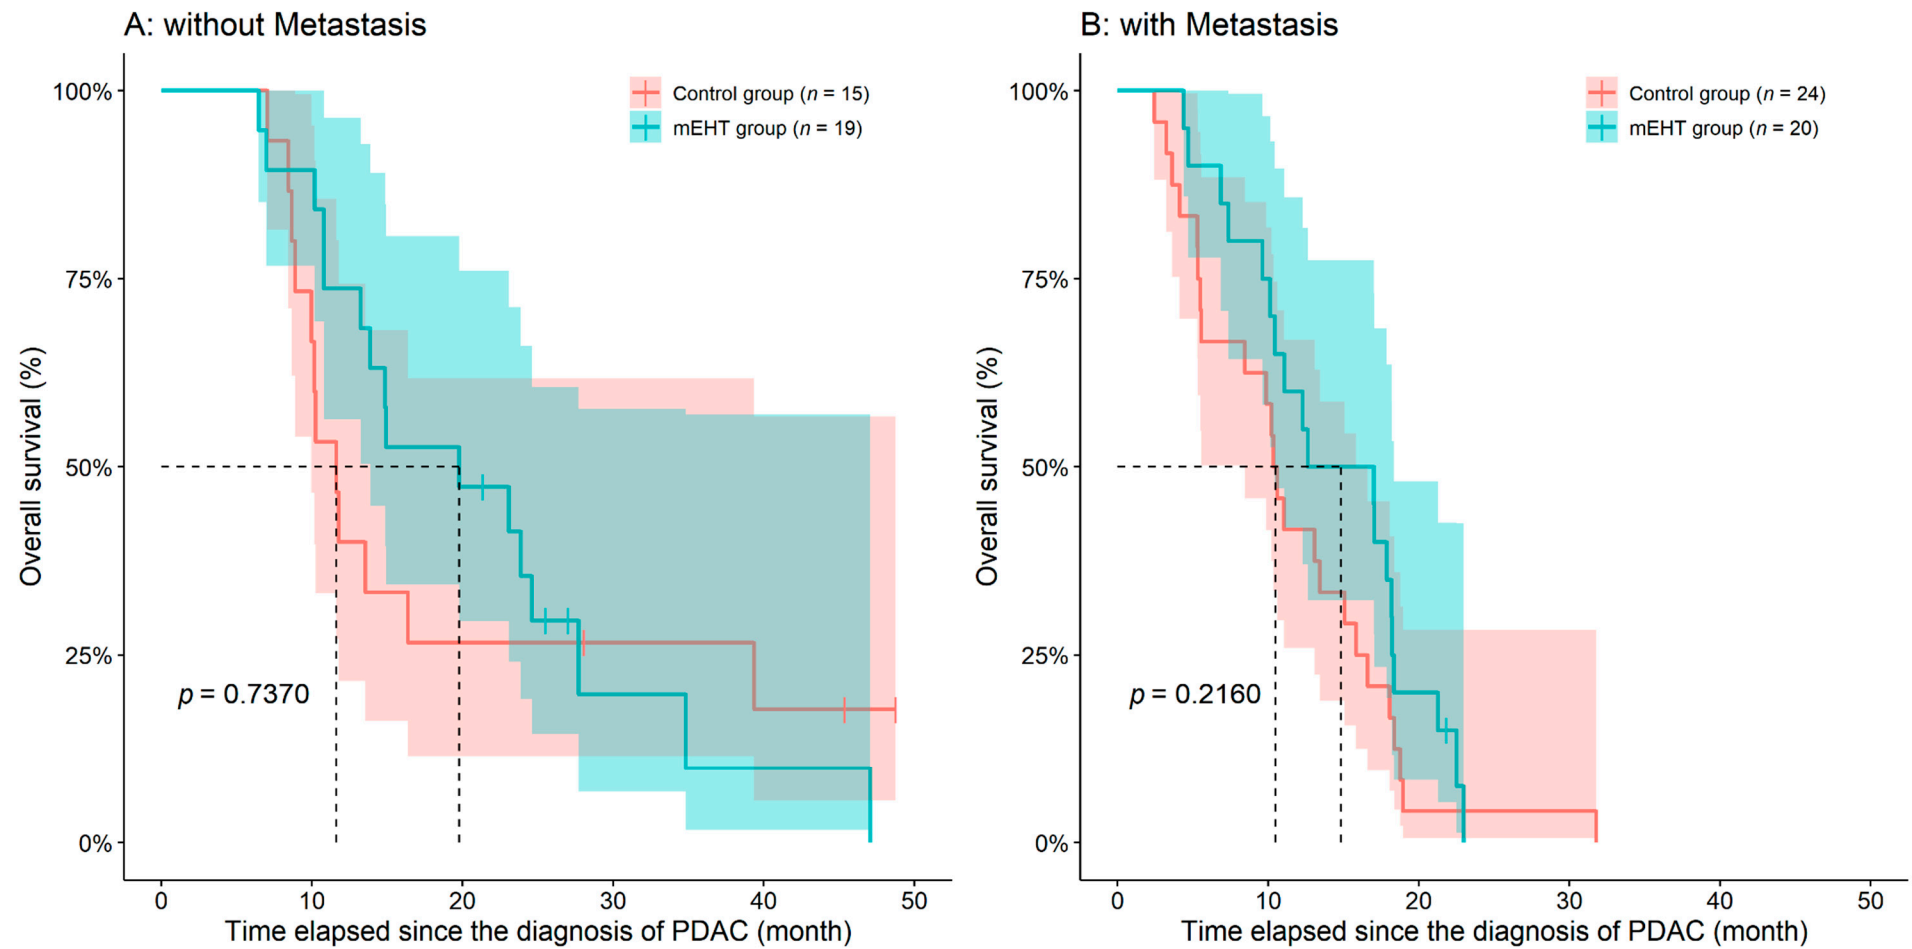

**Figure S1.** Inoperable pancreatic ductal adenocarcinoma (PDAC) patients treated with adjuvant modulated electro-hyperthermia (mEHT) had a trend to better survival both with **(B)** and without **(A)** the presence of metastases. The dotted line and the lighter colored intervals represent median survival and the asymmetrical 95% confidence interval, respectively.

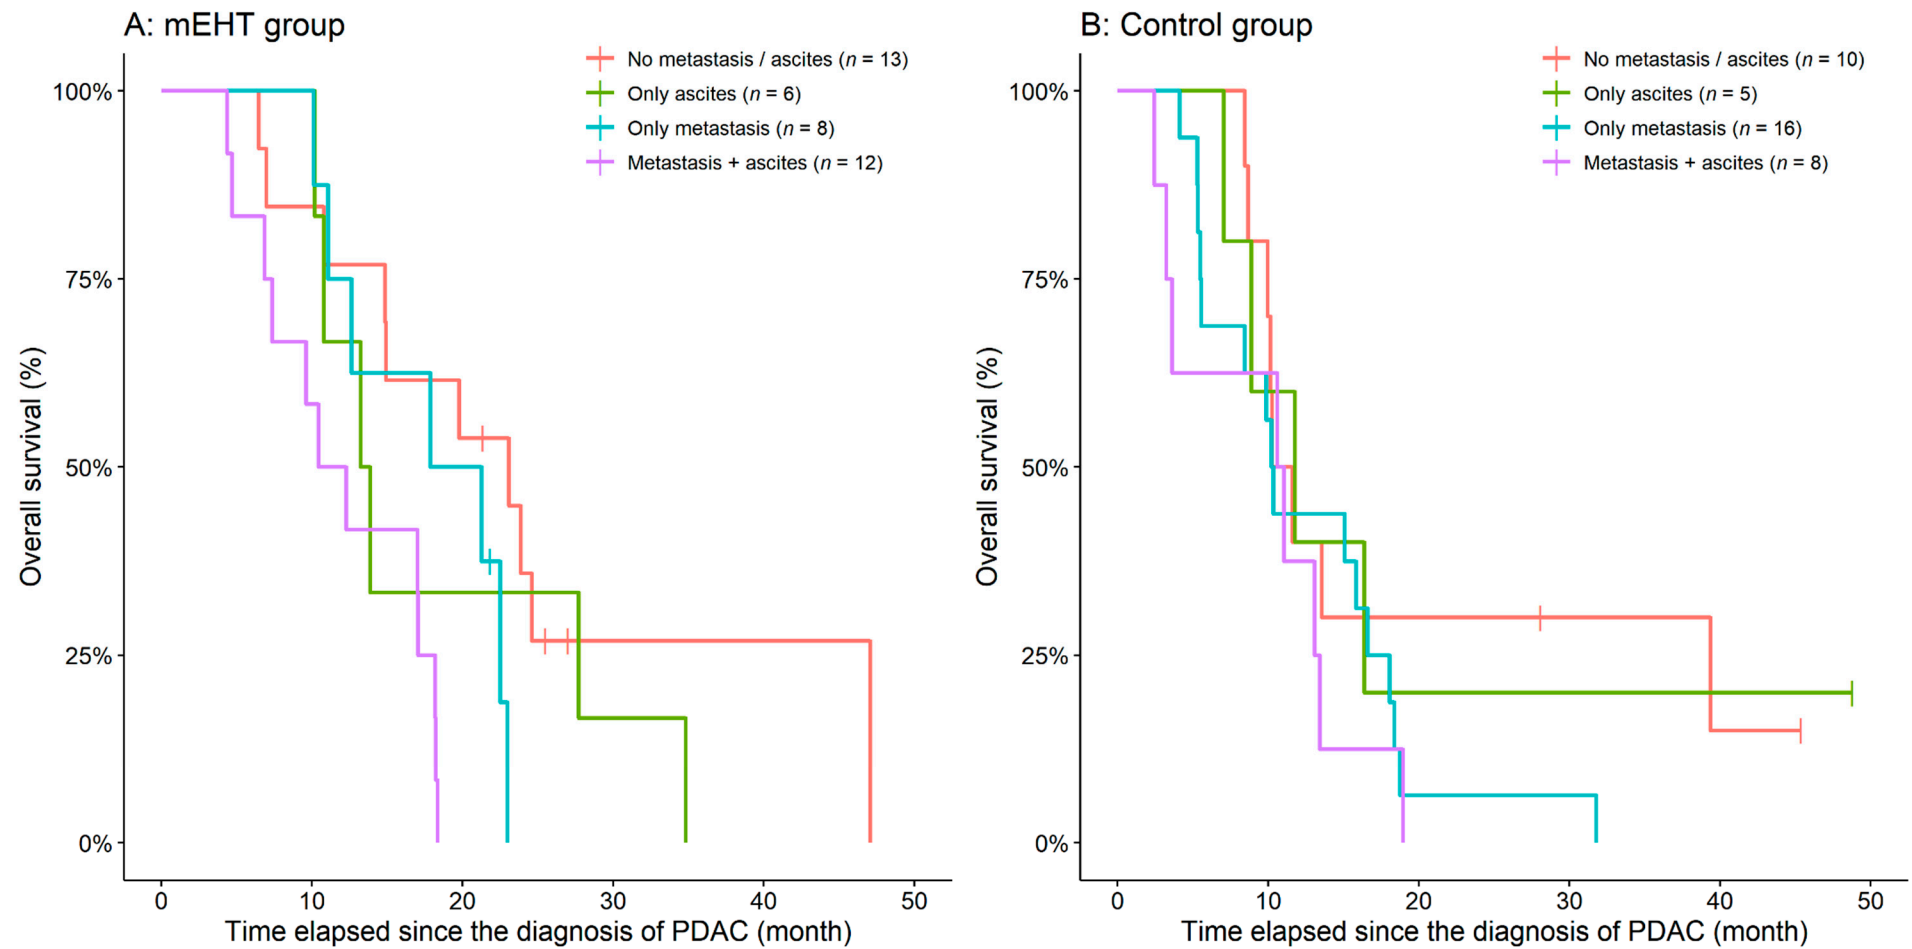

**Figure S2.** Differences in overall survival of inoperable pancreatic ductal adenocarcinoma (PDAC) patients who have been treated with (A) or without (B) adjuvant modulated electro-hyperthermia (mEHT) if ascites and/or metastases emerge.

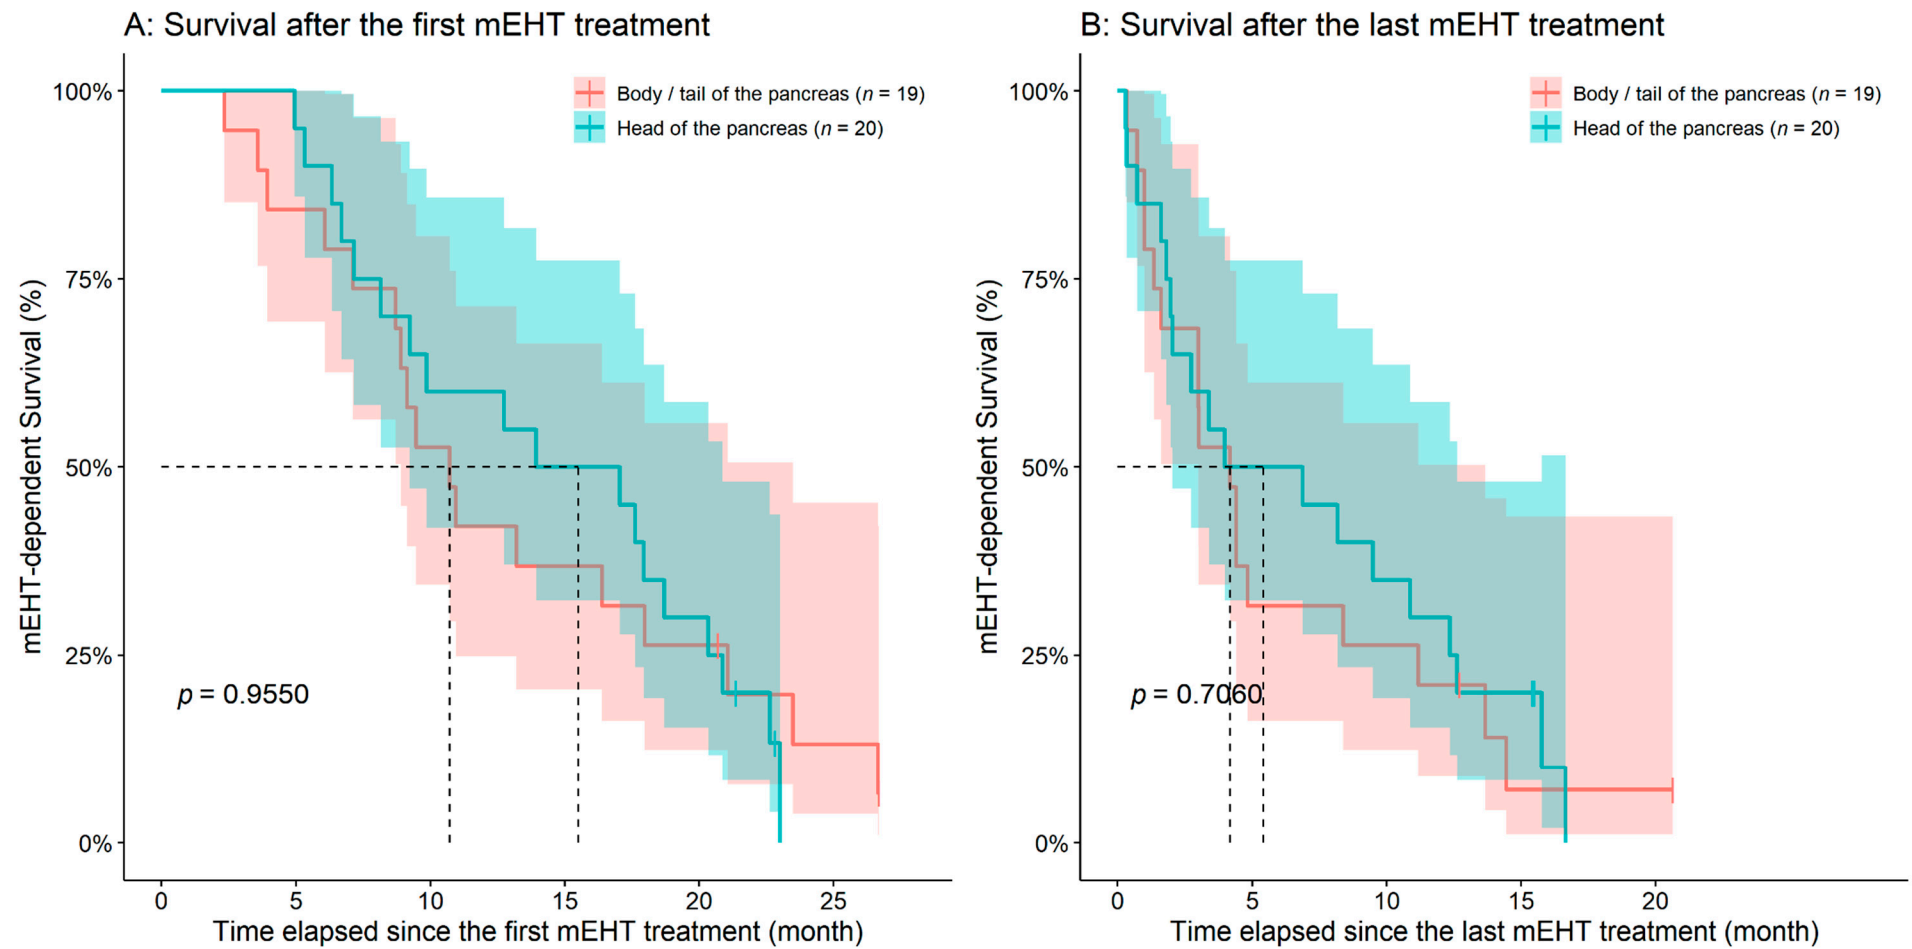

**Figure S3.** The location of the tumor on the pancreas did not affect the survival times after both the first (**A**) and the last (**B**) modulated electro-hyperthermia (mEHT) treatment. The dotted line and the lighter colored intervals represent median survival and the asymmetrical 95% confidence interval, respectively.
